# Supplementary material
Source: PubMed Central journal article supplement (PMC6648012)
Supplement: ao8b03414_si_001.pdf [file ao8b03414_si_001.pdf]

# Supporting Information

## **Dual Stimuli-Responsive Block Copolymers for Controlled Release Triggered by Upconversion Luminescence or Temperature Variation**

Yueh-Chi Chung,<sup>a</sup> Chien-Hsin Yang,<sup>a</sup> Rong-Ho Lee,<sup>b</sup> and Tzong-Liu Wang\*<sup>a</sup>

<sup>a</sup>Department of Chemical and Materials Engineering, National University of  
Kaohsiung, Kaohsiung 811, Taiwan, Republic of China

<sup>b</sup>Department of Chemical Engineering, National Chung Hsing University, Taichung  
402, Taiwan, Republic of China

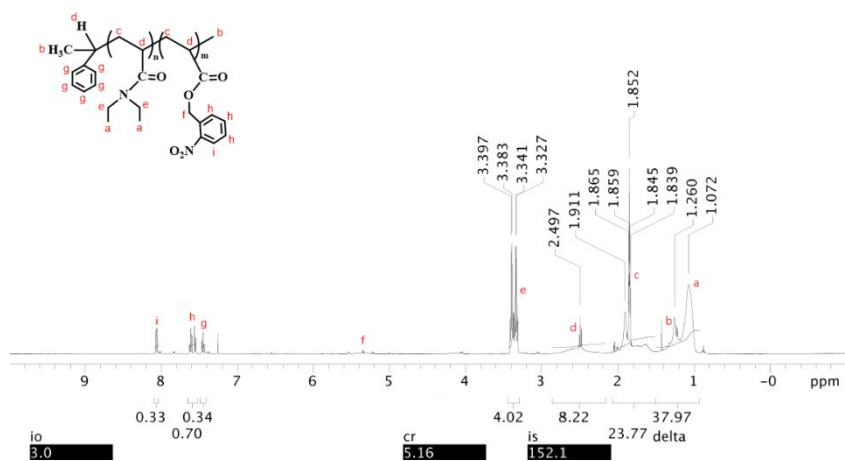

Figure S1. <sup>1</sup>H NMR (600MHz) spectrum of PDEAAm-*b*-PNBA.

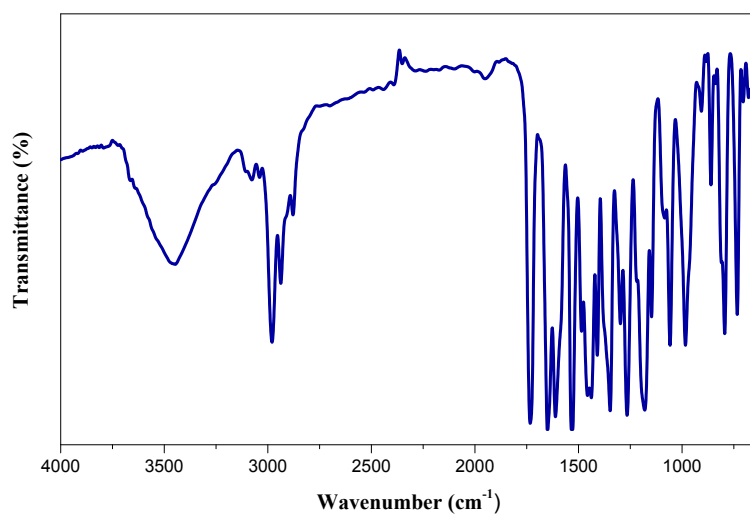

Figure S2. IR spectrum of PDEAAm-*b*-PNBA.

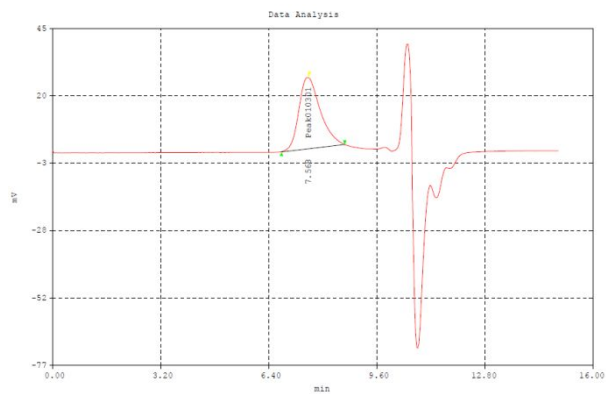

Analysis Result

| # | Peak       | Mn    | Mp    | Mw    | Mz    | Mz+1  | Mv  | PD      | IV  |
|---|------------|-------|-------|-------|-------|-------|-----|---------|-----|
| 1 | Peak010301 | 10959 | 14656 | 14035 | 17312 | 20760 | N/A | 1.28062 | N/A |

Figure S3. GPC curve and data of PDEAAm-*b*-PNBA.

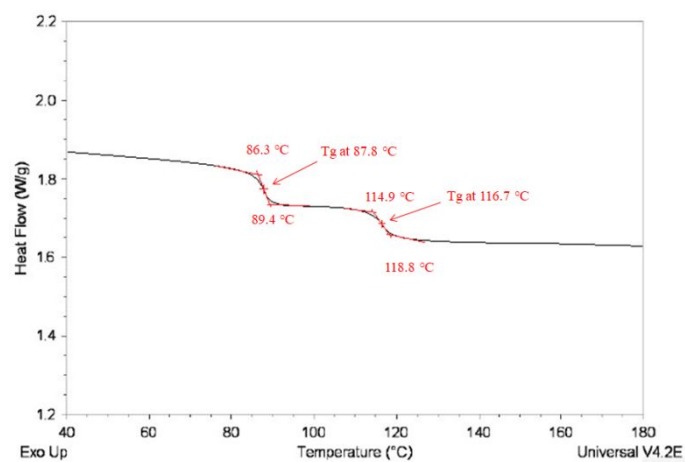

Figure S4. DSC thermogram of the block copolymer PDEAAm-*b*-PNBA.

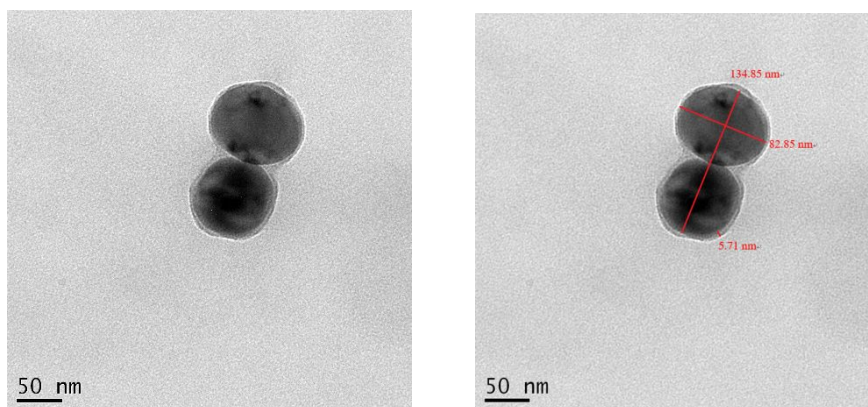

Figure S5. High-resolution TEM images of the UCNP-loaded BCP micelles.

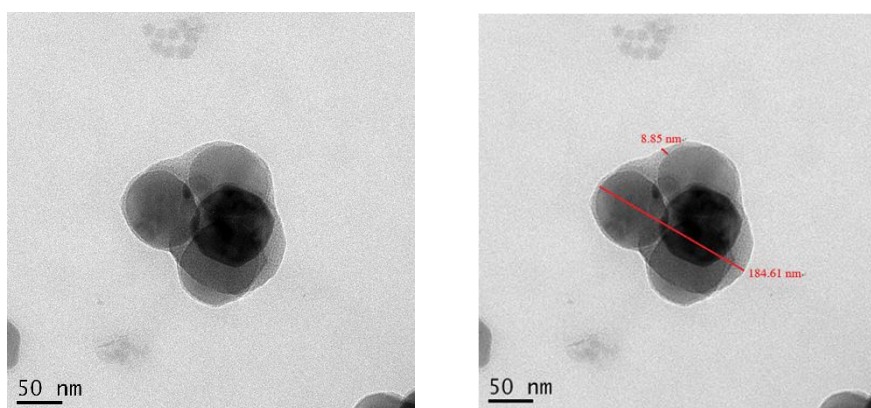

Figure S6. High-resolution TEM images of the UCNP and NR co-loaded BCP micelles.
